# Supplementary material for: Gold nanosheets via reduction of aqueous chloroaurate ions by anthracene anions bound to a liquid–liquid interface
Source: Royal Society of Chemistry journal article supplement (doi:10.1039/b302591h), 2003-01-01
Supplement: b302591h1.pdf [file b302591h1.pdf]

## Supporting Information (S-1)

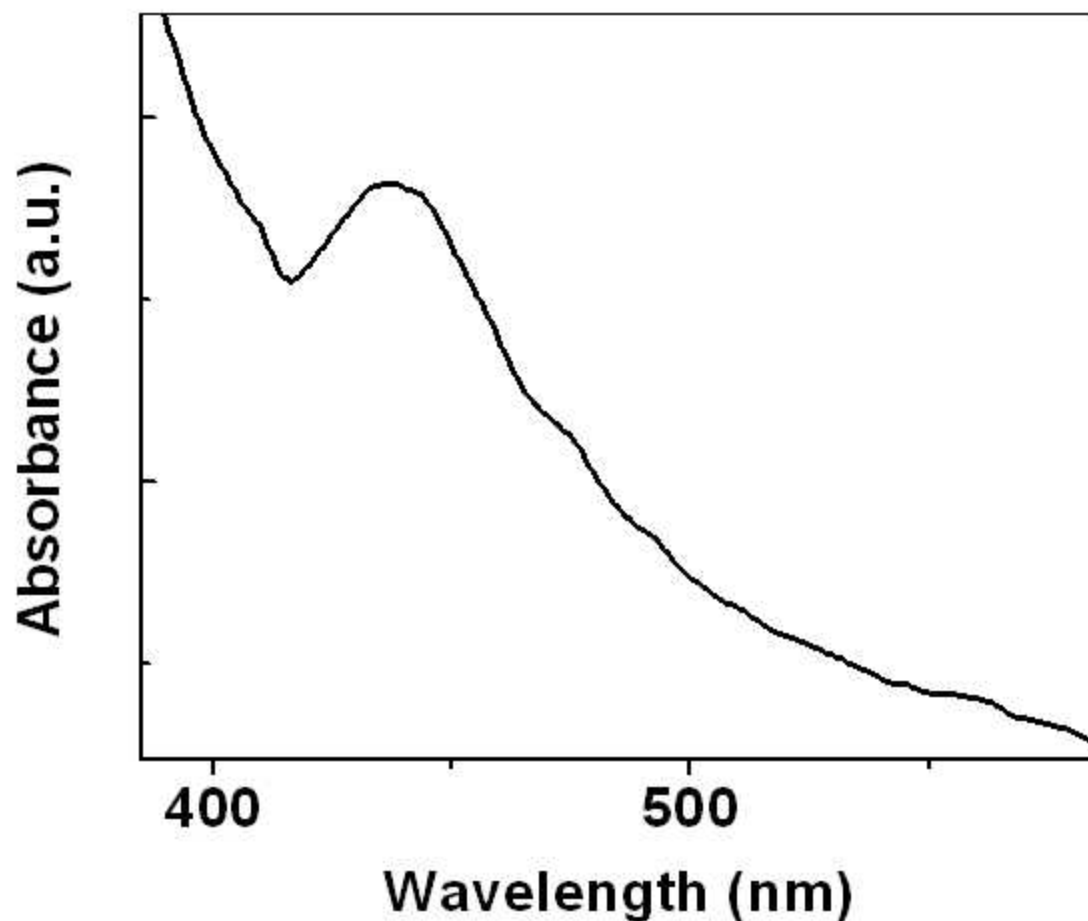

S1. UV-vis absorption spectrum of gold nanosheets grown using anthracene anions at the liquid-liquid interface.
